# Supplementary material
Source: PubMed Central journal article supplement (PMC8923030)
Supplement: NIHMS1708106-supplement-Supplemental_Tables.pdf [file NIHMS1708106-supplement-Supplemental_Tables.pdf]

- eTable 1.** List of ICD-9-CM and ICD-10-CM diagnosis/procedure codes for obstetric hemorrhage
- eTable 2.** Single-covariate adjusted model - Association between race/ethnicity and severe maternal morbidity among women with obstetric hemorrhage, by study period
- eTable 3.** Sensitivity analysis - Association between race/ethnicity and severe maternal morbidity among women with obstetric hemorrhage, by study period
- eTable 4.** Single-mediator adjustment model - Association between race/ethnicity and severe maternal morbidity excluding transfusions-only cases among women with obstetric hemorrhage, by study period
- eTable 5.** Sensitivity analysis - Association between race/ethnicity and severe maternal morbidity excluding transfusions-only cases among women with obstetric hemorrhage, by study period
- eTable 6.** Rate of hemorrhage-related severe maternal morbidity (SMM), by race/ethnicity and study period
- eTable 7.** Association between race/ethnicity and hemorrhage-related severe maternal morbidity (SMM), by study period

**eTable 1. List of ICD-9-CM and ICD-10-CM diagnosis/procedure codes for obstetric hemorrhage**

| <b>Condition</b>                | <b>Diagnosis or Procedure Codes</b> | <b>ICD-9 Codes</b> | <b>ICD-10 Codes</b> |
|---------------------------------|-------------------------------------|--------------------|---------------------|
| Placenta previa with hemorrhage | Has any of the diagnosis codes      | 641.10             | O44.10              |
|                                 |                                     | 641.11             | O44.12              |
|                                 |                                     | 641.13             | O44.13              |
|                                 |                                     |                    | O44.30              |
|                                 |                                     |                    | O44.32              |
|                                 |                                     |                    | O44.33              |
|                                 |                                     |                    | O44.50              |
|                                 |                                     |                    | O44.52              |
|                                 | O44.53                              |                    |                     |
| Abruptio placentae              | Has any of the diagnosis codes      | 641.20             | O45.002             |
|                                 |                                     | 641.21             | O45.003             |
|                                 |                                     | 641.23             | O45.009             |
|                                 |                                     |                    | O45.012             |
|                                 |                                     |                    | O45.013             |
|                                 |                                     |                    | O45.019             |
|                                 |                                     |                    | O45.022             |
|                                 |                                     |                    | O45.023             |
|                                 |                                     |                    | O45.029             |
|                                 |                                     |                    | O45.092             |
|                                 |                                     |                    | O45.093             |
|                                 |                                     |                    | O45.099             |
|                                 |                                     |                    | O45.8X2             |
|                                 |                                     |                    | O45.8X3             |
|                                 |                                     |                    | O45.8X9             |
|                                 |                                     |                    | O45.90              |
|                                 | O45.92                              |                    |                     |
|                                 | O45.93                              |                    |                     |
| Antepartum hemorrhage           | Has any of the diagnosis codes      | 641.30             | O46.002             |
|                                 |                                     | 641.31             | O46.003             |
|                                 |                                     | 641.33             | O46.009             |
|                                 |                                     | 641.80             | O46.012             |
|                                 |                                     | 641.81             | O46.013             |
|                                 |                                     | 641.83             | O46.019             |
|                                 |                                     | 641.90             | O46.022             |
|                                 |                                     | 641.91             | O46.023             |
|                                 |                                     | 641.93             | O46.029             |
|                                 |                                     |                    | O46.092             |
|                                 |                                     |                    | O46.093             |
|                                 |                                     |                    | O46.099             |
|                                 |                                     |                    | O46.8X2             |
|                                 |                                     |                    | O46.8X3             |
|                                 | O46.8X9                             |                    |                     |
|                                 | O46.92                              |                    |                     |
|                                 | O46.93                              |                    |                     |
| Postpartum hemorrhage           | Has any of the diagnosis codes      | 666.00             | O43.212             |
|                                 |                                     | 666.02             | O43.213             |
|                                 |                                     | 666.04             | O43.219             |
|                                 |                                     | 666.10             | O43.222             |
|                                 |                                     | 666.12             | O43.223             |
|                                 |                                     | 666.14             | O43.229             |
|                                 |                                     | 666.20             | O43.232             |
|                                 |                                     | 666.22             | O43.233             |
|                                 |                                     | 666.24             | O43.239             |
|                                 |                                     | 666.30             | O72.0               |
|                                 |                                     | 666.32             | O72.1               |
|                                 |                                     | 666.34             | O72.2               |

|                                                                 |                                            | O72.3   |         |
|-----------------------------------------------------------------|--------------------------------------------|---------|---------|
| Transfusion                                                     | Has any of the transfusion procedure codes | 99.00   | 30233H1 |
|                                                                 |                                            | 99.01   | 30233K1 |
|                                                                 |                                            | 99.02   | 30233L1 |
|                                                                 |                                            | 99.03   | 30233M1 |
|                                                                 |                                            | 99.04   | 30233N1 |
|                                                                 |                                            | 99.05   | 30233P1 |
|                                                                 |                                            | 99.06   | 30233R1 |
|                                                                 |                                            | 99.07   | 30233T1 |
|                                                                 |                                            | 99.08   | 30240H1 |
|                                                                 |                                            | 99.09   | 30240K1 |
|                                                                 |                                            |         | 30240L1 |
|                                                                 |                                            |         | 30240M1 |
|                                                                 |                                            |         | 30240N1 |
|                                                                 |                                            |         | 30240P1 |
|                                                                 |                                            |         | 30240R1 |
|                                                                 |                                            |         | 30240T1 |
|                                                                 |                                            |         | 30243H1 |
|                                                                 |                                            |         | 30243K1 |
|                                                                 |                                            |         | 30243L1 |
|                                                                 |                                            |         | 30243M1 |
|                                                                 |                                            |         | 30243N1 |
|                                                                 |                                            |         | 30243P1 |
|                                                                 |                                            |         | 30243R1 |
|                                                                 |                                            |         | 30243T1 |
|                                                                 |                                            |         | 30233N0 |
|                                                                 |                                            |         | 30233P0 |
|                                                                 |                                            |         | 30240N0 |
|                                                                 | 30240P0                                    |         |         |
|                                                                 | 30243N0                                    |         |         |
|                                                                 | 30243P0                                    |         |         |
|                                                                 | D57.00                                     |         |         |
| Does not have any of the diagnosis codes for sickle cell crisis | 282.62                                     | D57.01  |         |
|                                                                 | 282.64                                     | D57.02  |         |
|                                                                 | 282.69                                     | D57.211 |         |
|                                                                 |                                            | D57.212 |         |
|                                                                 |                                            | D57.219 |         |
|                                                                 |                                            | D57.411 |         |
|                                                                 |                                            | D57.412 |         |
|                                                                 |                                            | D57.419 |         |
|                                                                 |                                            | D57.811 |         |
|                                                                 |                                            | D57.812 |         |
|                                                                 | D57.819                                    |         |         |

**eTable 2. Single-covariate adjusted model - Association between race/ethnicity and severe maternal morbidity among women with obstetric hemorrhage, by study period**

| Race Ethnicity                          | Baseline         | Post-Intervention |
|-----------------------------------------|------------------|-------------------|
|                                         | RR (95% CI)*     | RR (95% CI)*      |
| <b>Unadjusted model</b>                 |                  |                   |
| White                                   | 1.00             | 1.00              |
| Black                                   | 1.34 (1.27-1.42) | 1.22 (1.05-1.40)  |
| Asian                                   | 1.03 (0.95-1.11) | 1.13 (1.00-1.28)  |
| Hispanics                               | 1.09 (1.03-1.15) | 1.10 (0.99-1.23)  |
| Others                                  | 1.08 (1.00-1.18) | 1.07 (0.92-1.25)  |
| <b>Single-covariate adjusted model</b>  |                  |                   |
| <b>Adjustment for Age at Delivery</b>   |                  |                   |
| White                                   | 1.00             | 1.00              |
| Black                                   | 1.35 (1.28-1.43) | 1.22 (1.06-1.41)  |
| Asian                                   | 1.02 (0.94-1.09) | 1.12 (0.99-1.26)  |
| Hispanics                               | 1.10 (1.04-1.16) | 1.11 (1.00-1.24)  |
| Others                                  | 1.07 (0.99-1.17) | 1.06 (0.91-1.24)  |
| <b>Adjustment for Education</b>         |                  |                   |
| White                                   | 1.00             | 1.00              |
| Black                                   | 1.32 (1.25-1.40) | 1.19 (1.03-1.38)  |
| Asian                                   | 1.03 (0.96-1.10) | 1.12 (0.99-1.27)  |
| Hispanics                               | 1.06 (1.01-1.12) | 1.05 (0.94-1.18)  |
| Others                                  | 1.08 (0.99-1.18) | 1.06 (0.91-1.24)  |
| <b>Adjustment for Parity</b>            |                  |                   |
| White                                   | 1.00             | 1.00              |
| Black                                   | 1.35 (1.27-1.43) | 1.22 (1.05-1.41)  |
| Asian                                   | 1.03 (0.95-1.11) | 1.13 (1.00-1.28)  |
| Hispanics                               | 1.09 (1.04-1.15) | 1.10 (0.99-1.23)  |
| Others                                  | 1.08 (1.00-1.18) | 1.07 (0.92-1.25)  |
| <b>Adjustment for Insurance Status</b>  |                  |                   |
| White                                   | 1.00             | 1.00              |
| Black                                   | 1.32 (1.25-1.40) | 1.19 (1.03-1.38)  |
| Asian                                   | 1.03 (0.97-1.10) | 1.14 (1.01-1.29)  |
| Hispanics                               | 1.07 (1.02-1.13) | 1.08 (0.97-1.21)  |
| Others                                  | 1.08 (0.99-1.17) | 1.07 (0.92-1.24)  |
| <b>Adjustment for Prenatal Care</b>     |                  |                   |
| White                                   | 1.00             | 1.00              |
| Black                                   | 1.35 (1.27-1.43) | 1.21 (1.05-1.40)  |
| Asian                                   | 1.03 (0.96-1.10) | 1.12 (1.00-1.26)  |
| Hispanics                               | 1.09 (1.03-1.15) | 1.09 (0.98-1.21)  |
| Others                                  | 1.08 (0.99-1.17) | 1.05 (0.90-1.21)  |
| <b>Adjustment for Pre-pregnancy BMI</b> |                  |                   |
| White                                   | 1.00             | 1.00              |
| Black                                   | 1.36 (1.27-1.45) | 1.21 (1.05-1.41)  |

|           |                  |                  |
|-----------|------------------|------------------|
| Asian     | 1.04 (0.98-1.10) | 1.13 (0.99-1.28) |
| Hispanics | 1.10 (1.04-1.16) | 1.11 (0.99-1.23) |
| Others    | 1.09 (1.01-1.19) | 1.09 (0.93-1.26) |

**Adjustment for Multiple Gestation**

|           |                  |                  |
|-----------|------------------|------------------|
| White     | 1.00             | 1.00             |
| Black     | 1.36 (1.28-1.44) | 1.23 (1.07-1.42) |
| Asian     | 1.04 (0.96-1.12) | 1.14 (1.01-1.28) |
| Hispanics | 1.11 (1.05-1.17) | 1.12 (1.01-1.25) |
| Others    | 1.11 (1.02-1.21) | 1.09 (0.94-1.27) |

**Adjustment for Chronic hypertension**

|           |                  |                  |
|-----------|------------------|------------------|
| White     | 1.00             | 1.00             |
| Black     | 1.33 (1.26-1.41) | 1.20 (1.04-1.39) |
| Asian     | 1.03 (0.96-1.11) | 1.13 (1.01-1.28) |
| Hispanics | 1.09 (1.03-1.15) | 1.10 (0.99-1.23) |
| Others    | 1.08 (0.99-1.17) | 1.06 (0.91-1.23) |

**Adjustment for Gestational Diabetes**

|           |                  |                  |
|-----------|------------------|------------------|
| White     | 1.00             | 1.00             |
| Black     | 1.34 (1.26-1.42) | 1.21 (1.05-1.40) |
| Asian     | 1.01 (0.94-1.09) | 1.12 (0.99-1.26) |
| Hispanics | 1.08 (1.03-1.14) | 1.09 (0.98-1.22) |
| Others    | 1.06 (0.98-1.15) | 1.05 (0.90-1.22) |

**Adjustment for Prior Cesarean Delivery**

|           |                  |                  |
|-----------|------------------|------------------|
| White     | 1.00             | 1.00             |
| Black     | 1.28 (1.21-1.36) | 1.15 (1.00-1.33) |
| Asian     | 1.03 (0.96-1.10) | 1.12 (1.00-1.26) |
| Hispanics | 1.07 (1.01-1.13) | 1.09 (0.98-1.21) |
| Others    | 1.05 (0.97-1.14) | 1.05 (0.90-1.22) |

**Adjustment for Labor Induction**

|           |                  |                  |
|-----------|------------------|------------------|
| White     | 1.00             | 1.00             |
| Black     | 1.34 (1.27-1.42) | 1.22 (1.05-1.41) |
| Asian     | 1.03 (0.95-1.11) | 1.13 (1.00-1.28) |
| Hispanics | 1.09 (1.03-1.15) | 1.10 (0.99-1.23) |
| Others    | 1.08 (1.00-1.18) | 1.07 (0.92-1.25) |

**Adjustment for Preterm Birth**

|           |                  |                  |
|-----------|------------------|------------------|
| White     | 1.00             | 1.00             |
| Black     | 1.33 (1.25-1.41) | 1.20 (1.04-1.40) |
| Asian     | 1.03 (0.96-1.11) | 1.14 (1.01-1.28) |
| Hispanics | 1.09 (1.04-1.15) | 1.10 (0.99-1.23) |
| Others    | 1.08 (0.99-1.17) | 1.07 (0.92-1.24) |

**Adjustment for Method of Delivery**

|           |                  |                  |
|-----------|------------------|------------------|
| White     | 1.00             | 1.00             |
| Black     | 1.24 (1.17-1.32) | 1.11 (0.96-1.27) |
| Asian     | 1.02 (0.94-1.10) | 1.13 (1.00-1.28) |
| Hispanics | 1.11 (1.05-1.17) | 1.12 (1.01-1.25) |

Others

1.05 (0.97-1.14)

1.06 (0.91-1.24)

---

Abbreviations: RR, relative risk; CI: confidence interval.

\*Model included study period, race ethnicity, the interaction term between study period and race ethnicity, and the specified covariate as fixed effects and hospital of delivery as random effect.

**eTable 3. Sensitivity analysis - Association between race/ethnicity and severe maternal morbidity among women with obstetric hemorrhage, by study period**

| Race Ethnicity                                          | Baseline         | Post-Intervention |
|---------------------------------------------------------|------------------|-------------------|
|                                                         | RR (95% CI)*     | RR (95% CI)*      |
| <b>Fully adjusted model</b>                             |                  |                   |
| White                                                   | 1.00             | 1.00              |
| Black                                                   | 1.22 (1.15-1.30) | 1.07 (0.92-1.24)  |
| Asian                                                   | 1.02 (0.96-1.09) | 1.09 (0.96-1.23)  |
| Hispanics                                               | 1.09 (1.04-1.15) | 1.06 (0.97-1.16)  |
| Others                                                  | 1.07 (0.98-1.16) | 1.03 (0.89-1.21)  |
| <b>Sensitivity analysis</b>                             |                  |                   |
| <b>Fully adjusted model excluding Age at Delivery</b>   |                  |                   |
| White                                                   | 1.00             | 1.00              |
| Black                                                   | 1.23 (1.15-1.31) | 1.08 (0.93-1.25)  |
| Asian                                                   | 1.02 (0.96-1.08) | 1.09 (0.97-1.23)  |
| Hispanics                                               | 1.10 (1.04-1.15) | 1.06 (0.97-1.17)  |
| Others                                                  | 1.07 (0.98-1.16) | 1.04 (0.89-1.21)  |
| <b>Fully adjusted model excluding Education</b>         |                  |                   |
| White                                                   | 1.00             | 1.00              |
| Black                                                   | 1.24 (1.17-1.32) | 1.09 (0.95-1.26)  |
| Asian                                                   | 1.02 (0.96-1.08) | 1.10 (0.98-1.24)  |
| Hispanics                                               | 1.11 (1.05-1.16) | 1.10 (1.00-1.21)  |
| Others                                                  | 1.06 (0.98-1.15) | 1.05 (0.90-1.21)  |
| <b>Fully adjusted model excluding Parity</b>            |                  |                   |
| White                                                   | 1.00             | 1.00              |
| Black                                                   | 1.21 (1.14-1.29) | 1.06 (0.91-1.22)  |
| Asian                                                   | 1.02 (0.96-1.09) | 1.09 (0.96-1.23)  |
| Hispanics                                               | 1.09 (1.03-1.14) | 1.05 (0.96-1.16)  |
| Others                                                  | 1.06 (0.97-1.15) | 1.03 (0.88-1.20)  |
| <b>Fully adjusted model excluding Insurance Status</b>  |                  |                   |
| White                                                   | 1.00             | 1.00              |
| Black                                                   | 1.24 (1.16-1.32) | 1.09 (0.94-1.26)  |
| Asian                                                   | 1.02 (0.95-1.09) | 1.08 (0.96-1.22)  |
| Hispanics                                               | 1.10 (1.05-1.16) | 1.07 (0.97-1.17)  |
| Others                                                  | 1.07 (0.98-1.16) | 1.04 (0.89-1.21)  |
| <b>Fully adjusted model excluding Prenatal Care</b>     |                  |                   |
| White                                                   | 1.00             | 1.00              |
| Black                                                   | 1.21 (1.14-1.29) | 1.07 (0.92-1.24)  |
| Asian                                                   | 1.02 (0.96-1.09) | 1.09 (0.97-1.24)  |
| Hispanics                                               | 1.09 (1.04-1.14) | 1.07 (0.97-1.18)  |
| Others                                                  | 1.07 (0.98-1.16) | 1.06 (0.91-1.24)  |
| <b>Fully adjusted model excluding Pre-pregnancy BMI</b> |                  |                   |

|                                                               |                  |                  |
|---------------------------------------------------------------|------------------|------------------|
| White                                                         | 1.00             | 1.00             |
| Black                                                         | 1.20 (1.13-1.27) | 1.05 (0.91-1.22) |
| Asian                                                         | 1.04 (0.98-1.11) | 1.12 (0.99-1.25) |
| Hispanics                                                     | 1.07 (1.03-1.13) | 1.05 (0.95-1.15) |
| Others                                                        | 1.06 (0.97-1.15) | 1.02 (0.87-1.20) |
| <b>Fully adjusted model excluding Multiple Gestation</b>      |                  |                  |
| White                                                         | 1.00             | 1.00             |
| Black                                                         | 1.21 (1.14-1.30) | 1.06 (0.91-1.23) |
| Asian                                                         | 1.01 (0.95-1.07) | 1.08 (0.96-1.23) |
| Hispanics                                                     | 1.09 (1.03-1.14) | 1.05 (0.96-1.16) |
| Others                                                        | 1.04 (0.96-1.13) | 1.02 (0.88-1.19) |
| <b>Fully adjusted model excluding Chronic hypertension</b>    |                  |                  |
| White                                                         | 1.00             | 1.00             |
| Black                                                         | 1.23 (1.15-1.31) | 1.08 (0.93-1.24) |
| Asian                                                         | 1.02 (0.96-1.08) | 1.09 (0.96-1.22) |
| Hispanics                                                     | 1.09 (1.04-1.15) | 1.06 (0.97-1.16) |
| Others                                                        | 1.07 (0.98-1.16) | 1.04 (0.89-1.21) |
| <b>Fully adjusted model excluding Gestational Diabetes</b>    |                  |                  |
| White                                                         | 1.00             | 1.00             |
| Black                                                         | 1.22 (1.15-1.30) | 1.07 (0.92-1.24) |
| Asian                                                         | 1.02 (0.96-1.09) | 1.09 (0.97-1.24) |
| Hispanics                                                     | 1.10 (1.04-1.15) | 1.06 (0.97-1.17) |
| Others                                                        | 1.07 (0.99-1.17) | 1.04 (0.89-1.21) |
| <b>Fully adjusted model excluding Prior Cesarean Delivery</b> |                  |                  |
| White                                                         | 1.00             | 1.00             |
| Black                                                         | 1.23 (1.16-1.31) | 1.08 (0.93-1.24) |
| Asian                                                         | 1.02 (0.95-1.08) | 1.09 (0.97-1.23) |
| Hispanics                                                     | 1.10 (1.04-1.15) | 1.06 (0.96-1.16) |
| Others                                                        | 1.07 (0.98-1.16) | 1.04 (0.89-1.21) |
| <b>Fully adjusted model excluding Labor Induction</b>         |                  |                  |
| White                                                         | 1.00             | 1.00             |
| Black                                                         | 1.22 (1.15-1.30) | 1.07 (0.92-1.24) |
| Asian                                                         | 1.01 (0.95-1.08) | 1.08 (0.96-1.22) |
| Hispanics                                                     | 1.09 (1.04-1.15) | 1.06 (0.96-1.16) |
| Others                                                        | 1.06 (0.98-1.15) | 1.03 (0.88-1.20) |
| <b>Fully adjusted model excluding Preterm Birth</b>           |                  |                  |
| White                                                         | 1.00             | 1.00             |
| Black                                                         | 1.22 (1.14-1.30) | 1.07 (0.92-1.24) |
| Asian                                                         | 1.02 (0.96-1.09) | 1.10 (0.97-1.24) |
| Hispanics                                                     | 1.10 (1.04-1.15) | 1.06 (0.97-1.17) |
| Others                                                        | 1.07 (0.98-1.16) | 1.04 (0.89-1.21) |



**Fully adjusted model excluding Method of Delivery**

|           |                  |                  |
|-----------|------------------|------------------|
| White     | 1.00             | 1.00             |
| Black     | 1.29 (1.21-1.38) | 1.14 (0.98-1.32) |
| Asian     | 1.03 (0.97-1.10) | 1.09 (0.97-1.23) |
| Hispanics | 1.09 (1.04-1.15) | 1.07 (0.97-1.17) |
| Others    | 1.09 (1.00-1.19) | 1.04 (0.89-1.21) |

---

Abbreviations: RR, relative risk; CI: confidence interval.

\*Fully adjusted model excluding the specified covariate.

**eTable 4. Single-mediator adjustment model - Association between race/ethnicity and severe maternal morbidity excluding transfusions-only cases among women with obstetric hemorrhage, by study period**

| Race Ethnicity                          | Baseline         | Post-Intervention |
|-----------------------------------------|------------------|-------------------|
|                                         | RR (95% CI)*     | RR (95% CI)*      |
| <b>Unadjusted model</b>                 |                  |                   |
| White                                   | 1.00             | 1.00              |
| Black                                   | 1.46 (1.30-1.65) | 1.22 (0.98-1.52)  |
| Asian                                   | 1.15 (1.05-1.25) | 1.09 (0.90-1.32)  |
| Hispanics                               | 1.05 (0.95-1.15) | 0.96 (0.82-1.12)  |
| Others                                  | 1.02 (0.87-1.19) | 0.97 (0.75-1.27)  |
| <b>Single-covariate adjusted model</b>  |                  |                   |
| <b>Adjustment for Age at Delivery</b>   |                  |                   |
| White                                   | 1.00             | 1.00              |
| Black                                   | 1.56 (1.38-1.76) | 1.27 (1.02-1.59)  |
| Asian                                   | 1.10 (1.00-1.20) | 1.06 (0.87-1.28)  |
| Hispanics                               | 1.11 (1.01-1.22) | 1.02 (0.87-1.19)  |
| Others                                  | 1.00 (0.85-1.17) | 0.96 (0.74-1.25)  |
| <b>Adjustment for Education</b>         |                  |                   |
| White                                   | 1.00             | 1.00              |
| Black                                   | 1.43 (1.26-1.62) | 1.15 (0.91-1.47)  |
| Asian                                   | 1.14 (1.05-1.25) | 1.07 (0.88-1.30)  |
| Hispanics                               | 1.02 (0.93-1.12) | 0.93 (0.79-1.10)  |
| Others                                  | 1.02 (0.87-1.19) | 0.98 (0.75-1.29)  |
| <b>Adjustment for Parity</b>            |                  |                   |
| White                                   | 1.00             | 1.00              |
| Black                                   | 1.44 (1.27-1.63) | 1.20 (0.96-1.49)  |
| Asian                                   | 1.14 (1.05-1.25) | 1.09 (0.90-1.32)  |
| Hispanics                               | 1.03 (0.93-1.13) | 0.95 (0.81-1.11)  |
| Others                                  | 0.99 (0.85-1.16) | 0.96 (0.74-1.25)  |
| <b>Adjustment for Insurance Status</b>  |                  |                   |
| White                                   | 1.00             | 1.00              |
| Black                                   | 1.46 (1.29-1.65) | 1.21 (0.97-1.52)  |
| Asian                                   | 1.15 (1.05-1.26) | 1.10 (0.91-1.33)  |
| Hispanics                               | 1.04 (0.95-1.14) | 0.96 (0.82-1.12)  |
| Others                                  | 1.01 (0.87-1.18) | 0.97 (0.75-1.27)  |
| <b>Adjustment for Prenatal Care</b>     |                  |                   |
| White                                   | 1.00             | 1.00              |
| Black                                   | 1.47 (1.30-1.67) | 1.21 (0.96-1.52)  |
| Asian                                   | 1.15 (1.05-1.25) | 1.08 (0.89-1.31)  |
| Hispanics                               | 1.04 (0.95-1.15) | 0.95 (0.82-1.10)  |
| Others                                  | 1.02 (0.87-1.20) | 0.92 (0.71-1.19)  |
| <b>Adjustment for Pre-pregnancy BMI</b> |                  |                   |
| White                                   | 1.00             | 1.00              |

|                                               |                  |                  |
|-----------------------------------------------|------------------|------------------|
| Black                                         | 1.48 (1.30-1.69) | 1.19 (0.94-1.50) |
| Asian                                         | 1.14 (1.04-1.25) | 1.14 (0.93-1.40) |
| Hispanics                                     | 1.04 (0.94-1.16) | 0.98 (0.84-1.15) |
| Others                                        | 1.02 (0.87-1.19) | 1.02 (0.79-1.32) |
| <b>Adjustment for Multiple Gestation</b>      |                  |                  |
| White                                         | 1.00             | 1.00             |
| Black                                         | 1.48 (1.31-1.68) | 1.23 (0.99-1.54) |
| Asian                                         | 1.16 (1.06-1.27) | 1.10 (0.91-1.33) |
| Hispanics                                     | 1.07 (0.97-1.17) | 0.98 (0.84-1.14) |
| Others                                        | 1.04 (0.89-1.22) | 0.99 (0.76-1.28) |
| <b>Adjustment for Chronic hypertension</b>    |                  |                  |
| White                                         | 1.00             | 1.00             |
| Black                                         | 1.44 (1.28-1.63) | 1.19 (0.95-1.48) |
| Asian                                         | 1.15 (1.05-1.26) | 1.10 (0.91-1.33) |
| Hispanics                                     | 1.05 (0.95-1.15) | 0.96 (0.82-1.12) |
| Others                                        | 1.00 (0.86-1.17) | 0.95 (0.72-1.23) |
| <b>Adjustment for Gestational Diabetes</b>    |                  |                  |
| White                                         | 1.00             | 1.00             |
| Black                                         | 1.45 (1.29-1.64) | 1.21 (0.97-1.51) |
| Asian                                         | 1.12 (1.02-1.22) | 1.06 (0.88-1.29) |
| Hispanics                                     | 1.03 (0.94-1.13) | 0.94 (0.81-1.10) |
| Others                                        | 0.98 (0.83-1.14) | 0.94 (0.72-1.22) |
| <b>Adjustment for Prior Cesarean Delivery</b> |                  |                  |
| White                                         | 1.00             | 1.00             |
| Black                                         | 1.36 (1.21-1.53) | 1.11 (0.89-1.39) |
| Asian                                         | 1.14 (1.05-1.25) | 1.08 (0.89-1.31) |
| Hispanics                                     | 1.01 (0.93-1.11) | 0.94 (0.81-1.09) |
| Others                                        | 0.97 (0.83-1.13) | 0.95 (0.72-1.24) |
| <b>Adjustment for Labor Induction</b>         |                  |                  |
| White                                         | 1.00             | 1.00             |
| Black                                         | 1.46 (1.30-1.65) | 1.22 (0.97-1.52) |
| Asian                                         | 1.14 (1.04-1.25) | 1.09 (0.90-1.32) |
| Hispanics                                     | 1.04 (0.95-1.15) | 0.96 (0.82-1.12) |
| Others                                        | 1.01 (0.87-1.18) | 0.97 (0.74-1.26) |
| <b>Adjustment for Preterm Birth</b>           |                  |                  |
| White                                         | 1.00             | 1.00             |
| Black                                         | 1.42 (1.26-1.60) | 1.19 (0.95-1.49) |
| Asian                                         | 1.16 (1.06-1.26) | 1.11 (0.92-1.34) |
| Hispanics                                     | 1.05 (0.96-1.16) | 0.97 (0.83-1.13) |
| Others                                        | 1.01 (0.86-1.18) | 0.97 (0.74-1.26) |
| <b>Adjustment for Method of Delivery</b>      |                  |                  |
| White                                         | 1.00             | 1.00             |
| Black                                         | 1.33 (1.18-1.50) | 1.08 (0.87-1.35) |
| Asian                                         | 1.12 (1.02-1.24) | 1.09 (0.90-1.32) |

|           |                  |                  |
|-----------|------------------|------------------|
| Hispanics | 1.08 (0.98-1.18) | 1.00 (0.86-1.16) |
| Others    | 0.98 (0.83-1.15) | 0.96 (0.73-1.25) |

---

Abbreviations: RR, relative risk; CI: confidence interval.

\*Model included study period, race ethnicity, the interaction term between study period and race ethnicity, and the specified covariate as fixed effects and hospital of delivery as random effect.

**eTable 5. Sensitivity analysis - Association between race/ethnicity and severe maternal morbidity excluding transfusions-only cases among women with obstetric hemorrhage, by study period**

| Race Ethnicity                                          | Baseline         | Post-Intervention |
|---------------------------------------------------------|------------------|-------------------|
|                                                         | RR (95% CI)*     | RR (95% CI)*      |
| <b>Fully adjusted model</b>                             |                  |                   |
| White                                                   | 1.00             | 1.00              |
| Black                                                   | 1.33 (1.16-1.52) | 0.99 (0.76-1.29)  |
| Asian                                                   | 1.06 (0.96-1.18) | 1.05 (0.86-1.27)  |
| Hispanics                                               | 1.05 (0.95-1.16) | 0.96 (0.82-1.12)  |
| Others                                                  | 0.95 (0.80-1.12) | 0.92 (0.70-1.22)  |
| <b>Sensitivity analysis</b>                             |                  |                   |
| <b>Fully adjusted model excluding Age at Delivery</b>   |                  |                   |
| White                                                   | 1.00             | 1.00              |
| Black                                                   | 1.31 (1.14-1.49) | 0.97 (0.75-1.27)  |
| Asian                                                   | 1.08 (0.97-1.19) | 1.05 (0.87-1.28)  |
| Hispanics                                               | 1.04 (0.94-1.15) | 0.95 (0.82-1.11)  |
| <b>Fully adjusted model excluding Education</b>         |                  |                   |
| White                                                   | 1.00             | 1.00              |
| Black                                                   | 1.37 (1.20-1.57) | 1.04 (0.81-1.32)  |
| Asian                                                   | 1.06 (0.96-1.18) | 1.06 (0.88-1.28)  |
| Hispanics                                               | 1.09 (0.98-1.21) | 1.00 (0.87-1.16)  |
| Others                                                  | 0.94 (0.79-1.11) | 0.91 (0.70-1.19)  |
| <b>Fully adjusted model excluding Parity</b>            |                  |                   |
| White                                                   | 1.00             | 1.00              |
| Black                                                   | 1.32 (1.16-1.51) | 0.98 (0.75-1.28)  |
| Asian                                                   | 1.06 (0.96-1.18) | 1.05 (0.86-1.27)  |
| Hispanics                                               | 1.05 (0.95-1.16) | 0.96 (0.82-1.11)  |
| Others                                                  | 0.94 (0.80-1.12) | 0.92 (0.70-1.21)  |
| <b>Fully adjusted model excluding Insurance Status</b>  |                  |                   |
| White                                                   | 1.00             | 1.00              |
| Black                                                   | 1.34 (1.17-1.52) | 0.99 (0.77-1.29)  |
| Asian                                                   | 1.06 (0.95-1.18) | 1.03 (0.86-1.25)  |
| Hispanics                                               | 1.06 (0.96-1.17) | 0.96 (0.83-1.12)  |
| Others                                                  | 0.95 (0.80-1.13) | 0.92 (0.70-1.22)  |
| <b>Fully adjusted model excluding Prenatal Care</b>     |                  |                   |
| White                                                   | 1.00             | 1.00              |
| Black                                                   | 1.32 (1.16-1.50) | 1.00 (0.77-1.30)  |
| Asian                                                   | 1.07 (0.97-1.19) | 1.08 (0.88-1.32)  |
| Hispanics                                               | 1.06 (0.96-1.16) | 0.98 (0.83-1.15)  |
| Others                                                  | 0.96 (0.81-1.13) | 0.99 (0.74-1.31)  |
| <b>Fully adjusted model excluding Pre-pregnancy BMI</b> |                  |                   |
| White                                                   | 1.00             | 1.00              |
| Black                                                   | 1.29 (1.14-1.46) | 0.98 (0.76-1.26)  |

|           |                  |                  |
|-----------|------------------|------------------|
| Asian     | 1.12 (1.02-1.23) | 1.05 (0.87-1.26) |
| Hispanics | 1.04 (0.95-1.14) | 0.93 (0.80-1.09) |
| Others    | 0.96 (0.81-1.13) | 0.88 (0.67-1.17) |

**Fully adjusted model excluding Multiple Gestation**

|           |                  |                  |
|-----------|------------------|------------------|
| White     | 1.00             | 1.00             |
| Black     | 1.32 (1.16-1.50) | 0.98 (0.76-1.28) |
| Asian     | 1.05 (0.95-1.17) | 1.04 (0.86-1.26) |
| Hispanics | 1.05 (0.95-1.16) | 0.95 (0.82-1.11) |
| Others    | 0.93 (0.79-1.11) | 0.91 (0.69-1.21) |

**Fully adjusted model excluding Chronic hypertension**

|           |                  |                  |
|-----------|------------------|------------------|
| White     | 1.00             | 1.00             |
| Black     | 1.34 (1.17-1.53) | 1.00 (0.77-1.30) |
| Asian     | 1.06 (0.96-1.18) | 1.04 (0.86-1.26) |
| Hispanics | 1.05 (0.95-1.16) | 0.96 (0.82-1.12) |
| Others    | 0.95 (0.80-1.13) | 0.93 (0.71-1.23) |

**Fully adjusted model excluding Gestational Diabetes**

|           |                  |                  |
|-----------|------------------|------------------|
| White     | 1.00             | 1.00             |
| Black     | 1.33 (1.17-1.52) | 0.98 (0.76-1.28) |
| Asian     | 1.07 (0.97-1.19) | 1.05 (0.87-1.28) |
| Hispanics | 1.06 (0.96-1.17) | 0.96 (0.83-1.12) |
| Others    | 0.96 (0.81-1.13) | 0.93 (0.71-1.22) |

**Fully adjusted model excluding Prior Cesarean Delivery**

|           |                  |                  |
|-----------|------------------|------------------|
| White     | 1.00             | 1.00             |
| Black     | 1.34 (1.17-1.54) | 1.00 (0.77-1.30) |
| Asian     | 1.06 (0.95-1.17) | 1.05 (0.87-1.28) |
| Hispanics | 1.05 (0.95-1.17) | 0.96 (0.82-1.12) |
| Others    | 0.95 (0.80-1.13) | 0.92 (0.70-1.22) |

**Fully adjusted model excluding Labor Induction**

|           |                  |                  |
|-----------|------------------|------------------|
| White     | 1.00             | 1.00             |
| Black     | 1.33 (1.16-1.52) | 0.99 (0.76-1.29) |
| Asian     | 1.06 (0.95-1.17) | 1.04 (0.86-1.26) |
| Hispanics | 1.05 (0.95-1.16) | 0.96 (0.82-1.12) |
| Others    | 0.94 (0.80-1.12) | 0.92 (0.70-1.21) |

**Fully adjusted model excluding Preterm Birth**

|           |                  |                  |
|-----------|------------------|------------------|
| White     | 1.00             | 1.00             |
| Black     | 1.33 (1.17-1.51) | 0.99 (0.76-1.29) |
| Asian     | 1.06 (0.96-1.18) | 1.05 (0.86-1.27) |
| Hispanics | 1.05 (0.95-1.16) | 0.96 (0.82-1.12) |
| Others    | 0.95 (0.80-1.12) | 0.92 (0.70-1.22) |

**Fully adjusted model excluding Method of Delivery**

|       |                  |                  |
|-------|------------------|------------------|
| White | 1.00             | 1.00             |
| Black | 1.43 (1.25-1.63) | 1.05 (0.81-1.37) |

|           |                  |                  |
|-----------|------------------|------------------|
| Asian     | 1.09 (0.99-1.20) | 1.05 (0.86-1.27) |
| Hispanics | 1.05 (0.96-1.16) | 0.96 (0.83-1.13) |
| Others    | 0.98 (0.83-1.16) | 0.94 (0.72-1.23) |

---

Abbreviations: RR, relative risk; CI: confidence interval.

\*Fully adjusted model excluding the specified covariate.

**eTable 6. Rate of hemorrhage-related severe maternal morbidity<sup>a</sup> (SMM), by race/ethnicity and study period**

| Race/Ethnicity                                                                   | Rate of hemorrhage-related SMM |             |                                |             |                                   |                                     | Effect Estimate          |                          |
|----------------------------------------------------------------------------------|--------------------------------|-------------|--------------------------------|-------------|-----------------------------------|-------------------------------------|--------------------------|--------------------------|
|                                                                                  | Baseline<br>Num/Denom          | Rate<br>(%) | Post-Intervention<br>Num/Denom | Rate<br>(%) | Absolute<br>Rate Reduction<br>(%) | Percentage<br>Rate Reduction<br>(%) | RR <sup>b</sup> (95% CI) | RR <sup>c</sup> (95% CI) |
| <b>Hemorrhage-related SMM</b>                                                    |                                |             |                                |             |                                   |                                     |                          |                          |
| <b>All combined</b>                                                              | 11,876/54,311                  | 21.9        | 3481/19165                     | 18.2        | 3.7                               | 17.0                                | 0.84 (0.75-0.93)         | 0.83 (0.75-0.93)         |
| <b>White</b>                                                                     | 3,095/15,775                   | 19.6        | 859/5401                       | 15.9        | 3.7                               | 19.0                                | 0.83 (0.70-0.97)         | 0.85 (0.73-0.98)         |
| <b>Black</b>                                                                     | 957/3,404                      | 28.1        | 231/1114                       | 20.7        | 7.4                               | 26.2                                | 0.74 (0.61-0.90)         | 0.74 (0.63-0.88)         |
| <b>Asian</b>                                                                     | 1,652/8,180                    | 20.2        | 602/3195                       | 18.8        | 1.4                               | 6.7                                 | 0.91 (0.79-1.05)         | 0.90 (0.78-1.05)         |
| <b>Hispanics</b>                                                                 | 5,399/23,051                   | 23.4        | 1582/8161                      | 19.4        | 4.0                               | 17.3                                | 0.84 (0.75-0.93)         | 0.82 (0.74-0.91)         |
| <b>Others</b>                                                                    | 773/3,901                      | 19.8        | 207/1294                       | 16.0        | 3.8                               | 19.3                                | 0.81 (0.68-0.96)         | 0.81 (0.67-0.98)         |
| <b>Hemorrhage-related SMM excluding cases with transfusion alone<sup>d</sup></b> |                                |             |                                |             |                                   |                                     |                          |                          |
| <b>All combined</b>                                                              | 3,522/54,311                   | 6.5         | 960/19165                      | 5.0         | 1.5                               | 22.7                                | 0.75 (0.66-0.85)         | 0.74 (0.65-0.85)         |
| <b>White</b>                                                                     | 955/15,775                     | 6.1         | 269/5401                       | 5.0         | 1.1                               | 17.7                                | 0.80 (0.66-0.97)         | 0.80 (0.66-0.96)         |
| <b>Black</b>                                                                     | 293/3,404                      | 8.6         | 65/1114                        | 5.8         | 2.8                               | 32.3                                | 0.65 (0.50-0.84)         | 0.60 (0.45-0.78)         |
| <b>Asian</b>                                                                     | 562/8,180                      | 6.9         | 167/3195                       | 5.2         | 1.6                               | 23.9                                | 0.75 (0.59-0.95)         | 0.77 (0.59-1.00)         |
| <b>Hispanics</b>                                                                 | 1,504/23,051                   | 6.5         | 406/8161                       | 5.0         | 1.6                               | 23.8                                | 0.74 (0.64-0.86)         | 0.72 (0.62-0.84)         |
| <b>Others</b>                                                                    | 208/3,901                      | 5.3         | 53/1294                        | 4.1         | 1.2                               | 23.1                                | 0.74 (0.55-0.99)         | 0.75 (0.55-1.02)         |

Abbreviations: SMM, severe maternal morbidity; Num, numerator; Denom, denominator; RR, relative risk; CI, confidence interval.

<sup>a</sup>Hemorrhage-related severe maternal morbidity includes transfusion, acute renal failure, adult respiratory distress, cardiac arrest, disseminated intravascular coagulation, acute heart failure, pulmonary edema, shock, hysterectomy, and ventilation.

<sup>b</sup>Model included study period, race/ethnicity, and the interaction term between study period and race/ethnicity as fixed effects and hospital of delivery as random effect.

<sup>c</sup>Model additionally included all of the maternal sociodemographic and clinical factors listed in Table 1 as fixed effects.

<sup>d</sup>In models estimating relative risks and confidence intervals for hemorrhage-related severe maternal morbidities, women with transfusion alone were excluded from the analysis.



**eTable 7. Association between race/ethnicity and hemorrhage-related severe maternal morbidity<sup>a</sup> (SMM), by study period**

| Race/Ethnicity                                                                                                                                                    | <u>Hemorrhage-related SMM</u> |                                      | <u>Hemorrhage-related SMM<br/>excluding cases with<br/>transfusion alone<sup>b</sup></u> |                                      |
|-------------------------------------------------------------------------------------------------------------------------------------------------------------------|-------------------------------|--------------------------------------|------------------------------------------------------------------------------------------|--------------------------------------|
|                                                                                                                                                                   | Baseline<br>RR (95% CI)       | Post-<br>Intervention<br>RR (95% CI) | Baseline<br>RR (95% CI)                                                                  | Post-<br>Intervention<br>RR (95% CI) |
| <b>Model 1<sup>c</sup>: Unadjusted model</b>                                                                                                                      |                               |                                      |                                                                                          |                                      |
| White                                                                                                                                                             | 1.00                          | 1.00                                 | 1.00                                                                                     | 1.00                                 |
| Black                                                                                                                                                             | 1.33 (1.26-1.41)              | 1.20 (1.03-1.40)                     | 1.41 (1.24-1.61)                                                                         | 1.14 (0.90-1.44)                     |
| Asian                                                                                                                                                             | 1.03 (0.95-1.11)              | 1.13 (1.00-1.29)                     | 1.15 (1.04-1.27)                                                                         | 1.08 (0.86-1.34)                     |
| Hispanics                                                                                                                                                         | 1.09 (1.04-1.15)              | 1.11 (0.99-1.24)                     | 1.04 (0.94-1.14)                                                                         | 0.96 (0.82-1.13)                     |
| Others                                                                                                                                                            | 1.06 (0.98-1.16)              | 1.04 (0.90-1.22)                     | 0.94 (0.81-1.10)                                                                         | 0.87 (0.65-1.15)                     |
| <b>Model 2<sup>d</sup>: Adjusted model – adjustment for<br/>sociodemographic factors</b>                                                                          |                               |                                      |                                                                                          |                                      |
| White                                                                                                                                                             | 1.00                          | 1.00                                 | 1.00                                                                                     | 1.00                                 |
| Black                                                                                                                                                             | 1.31 (1.24-1.38)              | 1.17 (1.00-1.37)                     | 1.42 (1.24-1.62)                                                                         | 1.12 (0.88-1.44)                     |
| Asian                                                                                                                                                             | 1.02 (0.96-1.09)              | 1.12 (0.98-1.27)                     | 1.10 (1.00-1.22)                                                                         | 1.03 (0.82-1.29)                     |
| Hispanics                                                                                                                                                         | 1.07 (1.02-1.12)              | 1.06 (0.95-1.18)                     | 1.03 (0.94-1.13)                                                                         | 0.95 (0.80-1.13)                     |
| Others                                                                                                                                                            | 1.05 (0.97-1.15)              | 1.03 (0.88-1.20)                     | 0.90 (0.77-1.06)                                                                         | 0.85 (0.64-1.13)                     |
| <b>Model 3<sup>e</sup>: Adjusted model – adjustment for<br/>sociodemographic and clinical factors except for<br/>method of delivery</b>                           |                               |                                      |                                                                                          |                                      |
| White                                                                                                                                                             | 1.00                          | 1.00                                 | 1.00                                                                                     | 1.00                                 |
| Black                                                                                                                                                             | 1.28 (1.20-1.36)              | 1.13 (0.96-1.33)                     | 1.37 (1.20-1.57)                                                                         | 1.02 (0.78-1.33)                     |
| Asian                                                                                                                                                             | 1.03 (0.97-1.09)              | 1.09 (0.96-1.23)                     | 1.07 (0.96-1.20)                                                                         | 1.01 (0.80-1.26)                     |
| Hispanics                                                                                                                                                         | 1.10 (1.04-1.15)              | 1.07 (0.97-1.18)                     | 1.05 (0.95-1.16)                                                                         | 0.96 (0.82-1.12)                     |
| Others                                                                                                                                                            | 1.07 (0.99-1.16)              | 1.01 (0.86-1.18)                     | 0.90 (0.76-1.05)                                                                         | 0.83 (0.63-1.09)                     |
| <b>Model 4<sup>f</sup>: Adjusted model – adjustment for all<br/>sociodemographic and clinical factors including<br/>method of delivery (fully adjusted model)</b> |                               |                                      |                                                                                          |                                      |
| White                                                                                                                                                             | 1.00                          | 1.00                                 | 1.00                                                                                     | 1.00                                 |
| Black                                                                                                                                                             | 1.21 (1.14-1.29)              | 1.06 (0.91-1.24)                     | 1.28 (1.12-1.47)                                                                         | 0.96 (0.74-1.24)                     |
| Asian                                                                                                                                                             | 1.01 (0.95-1.08)              | 1.08 (0.95-1.23)                     | 1.05 (0.94-1.17)                                                                         | 1.01 (0.81-1.26)                     |
| Hispanics                                                                                                                                                         | 1.10 (1.04-1.15)              | 1.06 (0.96-1.17)                     | 1.05 (0.95-1.17)                                                                         | 0.95 (0.81-1.12)                     |
| Others                                                                                                                                                            | 1.04 (0.96-1.13)              | 1.00 (0.86-1.17)                     | 0.87 (0.74-1.02)                                                                         | 0.82 (0.62-1.08)                     |

Abbreviations: SMM, severe maternal morbidity; RR, relative risk; CI: confidence interval.

<sup>a</sup>Hemorrhage-related severe maternal morbidity includes transfusion, acute renal failure, adult respiratory distress, cardiac arrest, disseminated intravascular coagulation, acute heart failure, pulmonary edema, shock, hysterectomy, and ventilation.

<sup>b</sup>Cases with transfusion alone were excluded from the analysis.

<sup>c</sup>Unadjusted model. Model included study period, race ethnicity, and the interaction term between study period and race ethnicity as fixed effects and hospital of delivery as random effect.

<sup>d</sup>Based on model 1, additionally included maternal sociodemographic factors (age at delivery, education levels, parity, and insurance status) as fixed effect.

<sup>e</sup>Based on model 2, additionally included maternal clinical factors (prenatal visits, pre-pregnancy body mass index, multiple pregnancy, chronic hypertension, gestational diabetes, prior cesarean delivery, labor induction, and pre-term birth) as fixed effect.

<sup>f</sup>Fully adjusted model. Based on model 3, additionally included method of delivery as fixed effect.
